# Supplementary material
Source: publisher figshare collection journal article supplement (https://acs.figshare.com/ndownloader/files/7605793)
Supplement: Supplementary file 1 [file 7605793]

#\#CIF_1.1
 
#  CIF produced by WinGX routine CIF_UPDATE
#  Created on 2016-09-28 at 09:58:55
#  Using CIFtbx version 3.0.4  1 Sep 2006
 
#  Dictionary name : cif_core.dic
#  Dictionary vers : 2.4.3
#  Request file    : c:\wingx\files\archive.reqdat
#  CIF files read  : yz167_1 yz167_1
 
#------------------ SECTION 1. GLOBAL INFORMATION ---------------------------#
 
data_global
 
#------------------ AUDIT DETAILS -------------------------------------------#
 
_audit_creation_date            2016-09-28
_audit_creation_method          'WinGX routine CIF_UPDATE'
_audit_conform_dict_name        cif_core.dic
_audit_conform_dict_version     2.4
_audit_conform_dict_location    ftp://ftp.iucr.org/pub/cif_core.dic
_audit_update_record            ?
 
#==============================================================================
#
# SUBMISSION DETAILS
# Name and address of author for correspondence
 
_publ_contact_author_name       'Kurpiewska, Katarzyna'
_publ_contact_author_address
;
Faculty of Chemistry, Jagiellonian University
R. Ingardena 3, 30-060 Krakow
;
_publ_contact_author_email       'kurpiews@chemia.uj.edu.pl'
_publ_contact_author_fax         '48126340515'
_publ_contact_author_phone       '48126632921'
 
 
_publ_contact_letter
;
 Submission dated :2016-09-28
 
Please consider this CIF for submission to the Cambridge Crystallographic
Data Centre. I certify that all authors have seen and approved of this
submission, that all have made significant scientific contributions to the
work reported, and that all share responsibility and accountability for
the results.
 
This CIF  is submitted as a personal communication
 
This CIF is submitted as part of a journal submission
<Insert Journal details here>
 
<Insert NAME here>
;
 
 
#==============================================================================
#
# TITLE AND AUTHOR LIST
 
_publ_section_title
; ?
;
_publ_section_title_footnote
; ?
;
 
# The loop structure below should contain the names and addresses of all
# authors, in the required order of publication. Repeat as necessary.
 
loop_
 _publ_author_name
 _publ_author_footnote
 _publ_author_address
?
?
;?
;
 
#------------------  SECTION 2. COMPOUND(S) DETAILS -------------------------#
 
data_yz167_1
 
_audit_creation_date                    2016-09-28T09:58:55-00:00
_audit_creation_method                  'WinGX routine CIF_UPDATE'
 
#----------------------------------------------------------------------------#
#                   CHEMICAL INFORMATION                                     #
#----------------------------------------------------------------------------#
 
_chemical_name_systematic
;
 ?
;
_chemical_formula_sum                   'C16 H30 N6 O4'
_chemical_formula_moiety                'C16 H30 N6 O4'
_chemical_formula_weight                370.46
 
#----------------------------------------------------------------------------#
#                   UNIT CELL INFORMATION                                    #
#----------------------------------------------------------------------------#
 
_symmetry_space_group_name_H-M_alt 'P 1 21/c 1'
_symmetry_space_group_name_H-M 'P 1 21/c 1'
_symmetry_space_group_name_Hall '-P 2ybc'
_symmetry_cell_setting monoclinic
_space_group_IT_number 14
_space_group_crystal_system monoclinic
_space_group_name_H-M_alt 'P 1 21/c 1'
loop_
    _symmetry_equiv_pos_as_xyz
'x, y, z'
'-x, y+1/2, -z+1/2'
'-x, -y, -z'
'x, -y-1/2, z-1/2'
 
_cell_length_a                  22.7944(8) 
_cell_length_b                  7.5374(2) 
_cell_length_c                  12.1001(4) 
_cell_angle_alpha               90.0 
_cell_angle_beta                102.072(4) 
_cell_angle_gamma               90.0 
_cell_volume                    2032.94(13) 
_cell_measurement_temperature   130.00(10) 
_cell_measurement_reflns_used   6114
_cell_measurement_theta_min     3.5030
_cell_measurement_theta_max     28.0790
_cell_oxdiff_length_a                  22.7990(12) 
_cell_oxdiff_length_b                  7.5368(3) 
_cell_oxdiff_length_c                  12.0952(6) 
_cell_oxdiff_angle_alpha               89.896(4) 
_cell_oxdiff_angle_beta                101.998(4) 
_cell_oxdiff_angle_gamma               89.991(4) 
_cell_oxdiff_volume                    2032.94(17) 
_cell_oxdiff_measurement_reflns_used   6113
_cell_formula_units_Z                   4
 
#----------------------------------------------------------------------------#
#                   CRYSTAL INFORMATION                                      #
#----------------------------------------------------------------------------#
 
_exptl_crystal_description              plate
_exptl_crystal_colour                   white
_exptl_crystal_size_max                 0.6
_exptl_crystal_size_mid                 0.6
_exptl_crystal_size_min                 0.4
_exptl_crystal_density_diffrn           1.21
_exptl_crystal_density_method           'not measured'
_exptl_crystal_F_000                    800
_exptl_special_details
;
 ?
;
 
#----------------------------------------------------------------------------#
#                   ABSORPTION CORRECTION                                    #
#----------------------------------------------------------------------------#
 
_exptl_absorpt_coefficient_mu           0.089
_exptl_absorpt_correction_T_min                   0.79125
_exptl_absorpt_correction_T_max                   1.00000
_exptl_absorpt_correction_type            multi-scan
_exptl_absorpt_process_details
;
CrysAlisPro 1.171.38.41r (Rigaku Oxford Diffraction, 2015)
Empirical absorption correction using spherical harmonics,
 implemented in SCALE3 ABSPACK scaling algorithm.
;
 
#----------------------------------------------------------------------------#
#                   DATA COLLECTION                                          #
#----------------------------------------------------------------------------#
 
_diffrn_ambient_temperature 130.00(10) 
_diffrn_ambient_environment N~2~
_diffrn_source 'micro-focus sealed X-ray tube'
_diffrn_source_type 'SuperNova (Mo) X-ray Source'
_diffrn_radiation_probe x-ray
_diffrn_radiation_type 'Mo K\a'
_diffrn_radiation_wavelength 0.71073
_diffrn_radiation_monochromator mirror
_diffrn_measurement_device 'four-circle diffractometer'
_diffrn_measurement_device_type 'SuperNova, Dual, Cu at zero, Atlas'
_diffrn_detector 'CCD plate'
_diffrn_detector_type Atlas
_diffrn_detector_area_resol_mean 10.3756
_diffrn_reflns_number 16392
_diffrn_reflns_av_R_equivalents 0.0347
_diffrn_reflns_av_sigmaI/netI 0.0503
_diffrn_reflns_limit_h_min -30
_diffrn_reflns_limit_h_max 30
_diffrn_reflns_limit_k_min -10
_diffrn_reflns_limit_k_max 9
_diffrn_reflns_limit_l_min -9
_diffrn_reflns_limit_l_max 16
_diffrn_reflns_theta_min 2.9164
_diffrn_reflns_theta_max 28.6222
_diffrn_measured_fraction_theta_max 0.9130
_diffrn_reflns_theta_full 26.3154
_diffrn_measured_fraction_theta_full 0.9978
_reflns_number_total                    4756
_reflns_number_gt                       3759
_reflns_threshold_expression            >2sigma(I)
 
#----------------------------------------------------------------------------#
#                   COMPUTER PROGRAMS USED                                   #
#----------------------------------------------------------------------------#
 
_computing_data_collection
;
        CrysAlisPro, Agilent Technologies,
        Version 1.171.36.20 (release 27-06-2012 CrysAlis171 .NET)
        (compiled Jul 11 2012,15:38:31)
;
_computing_cell_refinement
;
        CrysAlisPro, Agilent Technologies,
        Version 1.171.36.20 (release 27-06-2012 CrysAlis171 .NET)
        (compiled Jul 11 2012,15:38:31)
;
_computing_data_reduction
;
        CrysAlisPro, Agilent Technologies,
        Version 1.171.36.20 (release 27-06-2012 CrysAlis171 .NET)
        (compiled Jul 11 2012,15:38:31)
;
_computing_structure_refinement         'SHELXL-2014/6 (Sheldrick, 2014)'
 
#----------------------------------------------------------------------------#
#                   STRUCTURE SOLUTION                                       #
#----------------------------------------------------------------------------#
 
_atom_sites_solution_primary            direct
_atom_sites_solution_secondary          difmap
_atom_sites_solution_hydrogens          geom
 
#----------------------------------------------------------------------------#
#                   REFINEMENT INFORMATION                                   #
#----------------------------------------------------------------------------#
 
_refine_special_details
;
 Refinement of F^2^ against ALL reflections.  The weighted R-factor wR and
 goodness of fit S are based on F^2^, conventional R-factors R are based
 on F, with F set to zero for negative F^2^. The threshold expression of
 F^2^ > 2sigma(F^2^) is used only for calculating R-factors(gt) etc. and is
 not relevant to the choice of reflections for refinement.  R-factors based
 on F^2^ are statistically about twice as large as those based on F, and R-
 factors based on ALL data will be even larger.
;
_refine_ls_structure_factor_coef        Fsqd
_refine_ls_matrix_type                  full
_refine_ls_weighting_scheme
         'calc'
_refine_ls_hydrogen_treatment           mixed
_refine_ls_extinction_method            SHELXL
_refine_ls_extinction_expression
                                    Fc^*^=kFc[1+0.001xFc^2^\l^3^/sin(2\q)]^-1/4^
_refine_ls_extinction_coef              0.0097(8)
_refine_ls_number_reflns                4756
_refine_ls_number_parameters            252
_refine_ls_number_restraints            0
_refine_ls_R_factor_all                 0.0585
_refine_ls_R_factor_gt                  0.0414
_refine_ls_wR_factor_ref                0.1003
_refine_ls_wR_factor_gt                 0.0901
_refine_ls_goodness_of_fit_ref          1.048
_refine_ls_restrained_S_all             1.048
_refine_ls_shift/su_max                 0.001
_refine_ls_shift/su_mean                0
_refine_diff_density_max                0.263
_refine_diff_density_min                -0.183
_refine_diff_density_rms                0.041
 
#----------------------------------------------------------------------------#
#                   CONSTRAINTS AND RESTRAINTS                               #
#----------------------------------------------------------------------------#
 
 
#----------------------------------------------------------------------------#
#                   ATOMIC TYPES, COORDINATES AND THERMAL PARAMETERS         #
#----------------------------------------------------------------------------#
 
loop_
    _atom_type_symbol
    _atom_type_description
    _atom_type_scat_dispersion_real
    _atom_type_scat_dispersion_imag
    _atom_type_scat_source
C C 0.0033 0.0016 'International Tables Vol C Tables 4.2.6.8 and 6.1.1.4'
H H 0 0 'International Tables Vol C Tables 4.2.6.8 and 6.1.1.4'
N N 0.0061 0.0033 'International Tables Vol C Tables 4.2.6.8 and 6.1.1.4'
O O 0.0106 0.006 'International Tables Vol C Tables 4.2.6.8 and 6.1.1.4'
 
loop_
    _atom_site_label
    _atom_site_type_symbol
    _atom_site_fract_x
    _atom_site_fract_y
    _atom_site_fract_z
    _atom_site_U_iso_or_equiv
    _atom_site_adp_type
    _atom_site_occupancy
    _atom_site_calc_flag
    _atom_site_refinement_flags
    _atom_site_disorder_assembly
    _atom_site_disorder_group
O13 O 0.62373(4) 0.78428(12) 0.13063(8) 0.0240(2) Uani 1 d . . .
O21 O 0.84315(4) 0.98567(13) 0.28039(8) 0.0246(2) Uani 1 d . . .
O20 O 0.81308(4) 0.83909(12) 0.11589(8) 0.0260(2) Uani 1 d . . .
O12 O 0.61014(4) 1.07864(13) 0.16533(8) 0.0256(2) Uani 1 d . . .
N1 N 0.81900(5) 1.14809(14) -0.00273(9) 0.0181(2) Uani 1 d . . .
N10 N 0.69091(5) 0.97792(15) 0.10006(10) 0.0209(3) Uani 1 d . . .
N9 N 0.72133(5) 1.14203(15) 0.11585(9) 0.0181(2) Uani 1 d . . .
N2 N 0.84708(5) 1.09583(15) -0.08560(9) 0.0223(3) Uani 1 d . . .
N4 N 0.75329(5) 1.15971(15) -0.16000(9) 0.0226(3) Uani 1 d . . .
N3 N 0.80759(5) 1.10460(16) -0.17908(10) 0.0244(3) Uani 1 d . . .
C11 C 0.63814(6) 0.95750(18) 0.13544(11) 0.0199(3) Uani 1 d . . .
C5 C 0.76115(6) 1.18549(17) -0.05008(11) 0.0174(3) Uani 1 d . . .
C19 C 0.83205(6) 0.97047(18) 0.16805(11) 0.0198(3) Uani 1 d . . .
C14 C 0.57305(6) 0.72063(18) 0.17911(12) 0.0237(3) Uani 1 d . . .
C6 C 0.71418(6) 1.25117(17) 0.01194(11) 0.0181(3) Uani 1 d . . .
C26 C 1.01104(7) 1.3053(2) 0.10577(15) 0.0376(4) Uani 1 d . . .
H26A H 1.0267 1.4117 0.0793 0.056 Uiso 1 calc R . .
H26B H 1.0207 1.2056 0.0635 0.056 Uiso 1 calc R . .
H26C H 1.0285 1.2888 0.1845 0.056 Uiso 1 calc R . .
C18 C 0.85005(6) 1.14103(17) 0.11646(11) 0.0179(3) Uani 1 d . . .
H18 H 0.8372 1.2423 0.1563 0.021 Uiso 1 calc R . .
C22 C 0.82927(7) 0.8297(2) 0.34039(14) 0.0343(4) Uani 1 d . . .
H22A H 0.7873 0.803 0.3175 0.051 Uiso 1 calc R . .
H22B H 0.839 0.852 0.4203 0.051 Uiso 1 calc R . .
H22C H 0.8524 0.7308 0.3231 0.051 Uiso 1 calc R . .
C23 C 0.91844(6) 1.14853(18) 0.12980(12) 0.0223(3) Uani 1 d . . .
H23A H 0.9367 1.1311 0.2089 0.027 Uiso 1 calc R . .
H23B H 0.9308 1.0505 0.0879 0.027 Uiso 1 calc R . .
C24 C 0.94295(6) 1.32091(19) 0.08986(12) 0.0251(3) Uani 1 d . . .
H24 H 0.9258 1.3358 0.0091 0.03 Uiso 1 calc R . .
C17 C 0.58563(8) 0.7604(2) 0.30469(13) 0.0350(4) Uani 1 d . . .
H17A H 0.6247 0.7166 0.3393 0.053 Uiso 1 calc R . .
H17B H 0.556 0.7035 0.3383 0.053 Uiso 1 calc R . .
H17C H 0.5842 0.8862 0.316 0.053 Uiso 1 calc R . .
C8 C 0.65193(6) 1.2395(2) -0.06475(12) 0.0249(3) Uani 1 d . . .
H8A H 0.6438 1.1188 -0.0884 0.037 Uiso 1 calc R . .
H8B H 0.6505 1.3133 -0.1299 0.037 Uiso 1 calc R . .
H8C H 0.6224 1.2791 -0.0242 0.037 Uiso 1 calc R . .
C7 C 0.72822(6) 1.44402(17) 0.04834(12) 0.0223(3) Uani 1 d . . .
H7A H 0.6977 1.4882 0.085 0.034 Uiso 1 calc R . .
H7B H 0.7293 1.5152 -0.017 0.034 Uiso 1 calc R . .
H7C H 0.7664 1.4494 0.0998 0.034 Uiso 1 calc R . .
C16 C 0.57414(7) 0.52218(19) 0.15757(15) 0.0337(4) Uani 1 d . . .
H16A H 0.5681 0.5009 0.0778 0.05 Uiso 1 calc R . .
H16B H 0.5428 0.4657 0.1867 0.05 Uiso 1 calc R . .
H16C H 0.6123 0.4746 0.1946 0.05 Uiso 1 calc R . .
C15 C 0.51454(7) 0.8009(2) 0.11626(14) 0.0342(4) Uani 1 d . . .
H15A H 0.5149 0.9265 0.1295 0.051 Uiso 1 calc R . .
H15B H 0.4817 0.7481 0.1427 0.051 Uiso 1 calc R . .
H15C H 0.51 0.7789 0.0368 0.051 Uiso 1 calc R . .
C25 C 0.92643(8) 1.4820(2) 0.15243(15) 0.0365(4) Uani 1 d . . .
H25A H 0.8836 1.4966 0.1357 0.055 Uiso 1 calc R . .
H25B H 0.9449 1.5859 0.1288 0.055 Uiso 1 calc R . .
H25C H 0.9403 1.4654 0.2323 0.055 Uiso 1 calc R . .
H9 H 0.7091(7) 1.202(2) 0.1699(14) 0.027(4) Uiso 1 d . . .
H10 H 0.7147(7) 0.885(2) 0.1026(12) 0.024(4) Uiso 1 d . . .
 
loop_
    _atom_site_aniso_label
    _atom_site_aniso_U_11
    _atom_site_aniso_U_22
    _atom_site_aniso_U_33
    _atom_site_aniso_U_23
    _atom_site_aniso_U_13
    _atom_site_aniso_U_12
O13 0.0217(5) 0.0182(5) 0.0356(6) -0.0022(4) 0.0140(4) -0.0045(4)
O21 0.0281(5) 0.0235(5) 0.0219(5) 0.0072(4) 0.0041(4) -0.0029(4)
O20 0.0256(5) 0.0185(5) 0.0335(6) -0.0016(4) 0.0055(4) -0.0018(4)
O12 0.0262(5) 0.0209(5) 0.0324(5) -0.0028(4) 0.0120(4) -0.0012(4)
N1 0.0193(5) 0.0185(5) 0.0174(5) -0.0007(4) 0.0057(4) 0.0001(4)
N10 0.0188(6) 0.0168(6) 0.0283(6) -0.0008(5) 0.0074(5) -0.0024(5)
N9 0.0207(6) 0.0173(5) 0.0168(5) 0.0001(5) 0.0052(5) -0.0043(4)
N2 0.0264(6) 0.0218(6) 0.0204(6) -0.0016(5) 0.0089(5) 0.0018(5)
N4 0.0259(6) 0.0236(6) 0.0189(6) 0.0006(5) 0.0059(5) 0.0017(5)
N3 0.0278(6) 0.0259(6) 0.0210(6) -0.0008(5) 0.0086(5) 0.0026(5)
C11 0.0195(6) 0.0210(7) 0.0191(6) -0.0001(5) 0.0034(5) -0.0028(5)
C5 0.0195(6) 0.0154(6) 0.0173(6) 0.0018(5) 0.0033(5) -0.0013(5)
C19 0.0151(6) 0.0205(7) 0.0237(7) 0.0023(6) 0.0040(5) 0.0026(5)
C14 0.0208(7) 0.0224(7) 0.0309(8) -0.0020(6) 0.0124(6) -0.0061(5)
C6 0.0177(6) 0.0198(6) 0.0170(6) 0.0012(5) 0.0043(5) 0.0004(5)
C26 0.0232(8) 0.0432(10) 0.0465(10) 0.0135(8) 0.0075(7) -0.0060(7)
C18 0.0173(6) 0.0189(6) 0.0171(6) 0.0003(5) 0.0027(5) -0.0009(5)
C22 0.0350(9) 0.0342(9) 0.0342(8) 0.0160(7) 0.0081(7) -0.0039(7)
C23 0.0170(6) 0.0238(7) 0.0252(7) 0.0038(6) 0.0025(5) -0.0006(5)
C24 0.0209(7) 0.0274(7) 0.0264(7) 0.0048(6) 0.0041(6) -0.0042(6)
C17 0.0451(10) 0.0319(8) 0.0307(8) -0.0005(7) 0.0138(7) -0.0079(7)
C8 0.0193(7) 0.0330(8) 0.0212(7) 0.0013(6) 0.0014(5) 0.0007(6)
C7 0.0241(7) 0.0184(7) 0.0258(7) 0.0014(6) 0.0082(6) 0.0012(5)
C16 0.0361(9) 0.0244(8) 0.0461(10) -0.0032(7) 0.0216(8) -0.0093(7)
C15 0.0215(7) 0.0365(9) 0.0447(9) -0.0033(8) 0.0073(7) -0.0041(6)
C25 0.0389(9) 0.0269(8) 0.0449(10) -0.0028(7) 0.0114(8) -0.0114(7)
 
 
#----------------------------------------------------------------------------#
#                   MOLECULAR GEOMETRY                                       #
#----------------------------------------------------------------------------#
 
_geom_special_details
;
 All esds (except the esd in the dihedral angle between two l.s. planes)
 are estimated using the full covariance matrix.  The cell esds are taken
 into account individually in the estimation of esds in distances, angles
 and torsion angles; correlations between esds in cell parameters are only
 used when they are defined by crystal symmetry.  An approximate (isotropic)
 treatment of cell esds is used for estimating esds involving l.s. planes.
;
loop_
    _geom_bond_atom_site_label_1
    _geom_bond_atom_site_label_2
    _geom_bond_distance
    _geom_bond_site_symmetry_2
    _geom_bond_publ_flag
O13 C11 1.3446(16) . ?
O13 C14 1.4807(15) . ?
O21 C19 1.3345(16) . ?
O21 C22 1.4511(16) . ?
O20 C19 1.2049(16) . ?
O12 C11 1.2118(16) . ?
N1 C5 1.3529(16) . ?
N1 N2 1.3560(14) . ?
N1 C18 1.4686(16) . ?
N10 C11 1.3671(16) . ?
N10 N9 1.4114(15) . ?
N10 H10 0.882(16) . ?
N9 C6 1.4827(16) . ?
N9 H9 0.886(16) . ?
N2 N3 1.2916(16) . ?
N4 C5 1.3188(16) . ?
N4 N3 1.3703(15) . ?
C5 C6 1.5134(17) . ?
C19 C18 1.5225(18) . ?
C14 C15 1.516(2) . ?
C14 C17 1.516(2) . ?
C14 C16 1.519(2) . ?
C6 C8 1.5269(18) . ?
C6 C7 1.5330(18) . ?
C26 C24 1.528(2) . ?
C26 H26A 0.96 . ?
C26 H26B 0.96 . ?
C26 H26C 0.96 . ?
C18 C23 1.5344(17) . ?
C18 H18 0.98 . ?
C22 H22A 0.96 . ?
C22 H22B 0.96 . ?
C22 H22C 0.96 . ?
C23 C24 1.5319(18) . ?
C23 H23A 0.97 . ?
C23 H23B 0.97 . ?
C24 C25 1.520(2) . ?
C24 H24 0.98 . ?
C17 H17A 0.96 . ?
C17 H17B 0.96 . ?
C17 H17C 0.96 . ?
C8 H8A 0.96 . ?
C8 H8B 0.96 . ?
C8 H8C 0.96 . ?
C7 H7A 0.96 . ?
C7 H7B 0.96 . ?
C7 H7C 0.96 . ?
C16 H16A 0.96 . ?
C16 H16B 0.96 . ?
C16 H16C 0.96 . ?
C15 H15A 0.96 . ?
C15 H15B 0.96 . ?
C15 H15C 0.96 . ?
C25 H25A 0.96 . ?
C25 H25B 0.96 . ?
C25 H25C 0.96 . ?
 
loop_
    _geom_angle_atom_site_label_1
    _geom_angle_atom_site_label_2
    _geom_angle_atom_site_label_3
    _geom_angle
    _geom_angle_site_symmetry_1
    _geom_angle_site_symmetry_3
    _geom_angle_publ_flag
C11 O13 C14 120.08(10) . . ?
C19 O21 C22 115.17(11) . . ?
C5 N1 N2 108.44(10) . . ?
C5 N1 C18 130.57(10) . . ?
N2 N1 C18 120.70(10) . . ?
C11 N10 N9 119.72(11) . . ?
C11 N10 H10 118.4(9) . . ?
N9 N10 H10 114.2(10) . . ?
N10 N9 C6 114.07(10) . . ?
N10 N9 H9 108.9(10) . . ?
C6 N9 H9 110.3(10) . . ?
N3 N2 N1 106.41(10) . . ?
C5 N4 N3 106.12(11) . . ?
N2 N3 N4 110.89(10) . . ?
O12 C11 O13 127.26(12) . . ?
O12 C11 N10 124.16(12) . . ?
O13 C11 N10 108.58(11) . . ?
N4 C5 N1 108.13(11) . . ?
N4 C5 C6 125.97(12) . . ?
N1 C5 C6 125.87(11) . . ?
O20 C19 O21 125.10(12) . . ?
O20 C19 C18 125.25(12) . . ?
O21 C19 C18 109.59(11) . . ?
O13 C14 C15 110.45(12) . . ?
O13 C14 C17 109.47(11) . . ?
C15 C14 C17 112.71(12) . . ?
O13 C14 C16 102.06(10) . . ?
C15 C14 C16 110.54(13) . . ?
C17 C14 C16 111.10(13) . . ?
N9 C6 C5 105.98(10) . . ?
N9 C6 C8 114.00(10) . . ?
C5 C6 C8 110.09(11) . . ?
N9 C6 C7 107.65(10) . . ?
C5 C6 C7 109.02(10) . . ?
C8 C6 C7 109.93(11) . . ?
C24 C26 H26A 109.5 . . ?
C24 C26 H26B 109.5 . . ?
H26A C26 H26B 109.5 . . ?
C24 C26 H26C 109.5 . . ?
H26A C26 H26C 109.5 . . ?
H26B C26 H26C 109.5 . . ?
N1 C18 C19 108.50(10) . . ?
N1 C18 C23 111.87(10) . . ?
C19 C18 C23 110.06(10) . . ?
N1 C18 H18 108.8 . . ?
C19 C18 H18 108.8 . . ?
C23 C18 H18 108.8 . . ?
O21 C22 H22A 109.5 . . ?
O21 C22 H22B 109.5 . . ?
H22A C22 H22B 109.5 . . ?
O21 C22 H22C 109.5 . . ?
H22A C22 H22C 109.5 . . ?
H22B C22 H22C 109.5 . . ?
C24 C23 C18 115.31(11) . . ?
C24 C23 H23A 108.4 . . ?
C18 C23 H23A 108.4 . . ?
C24 C23 H23B 108.4 . . ?
C18 C23 H23B 108.4 . . ?
H23A C23 H23B 107.5 . . ?
C25 C24 C26 110.48(13) . . ?
C25 C24 C23 112.09(11) . . ?
C26 C24 C23 108.82(12) . . ?
C25 C24 H24 108.5 . . ?
C26 C24 H24 108.5 . . ?
C23 C24 H24 108.5 . . ?
C14 C17 H17A 109.5 . . ?
C14 C17 H17B 109.5 . . ?
H17A C17 H17B 109.5 . . ?
C14 C17 H17C 109.5 . . ?
H17A C17 H17C 109.5 . . ?
H17B C17 H17C 109.5 . . ?
C6 C8 H8A 109.5 . . ?
C6 C8 H8B 109.5 . . ?
H8A C8 H8B 109.5 . . ?
C6 C8 H8C 109.5 . . ?
H8A C8 H8C 109.5 . . ?
H8B C8 H8C 109.5 . . ?
C6 C7 H7A 109.5 . . ?
C6 C7 H7B 109.5 . . ?
H7A C7 H7B 109.5 . . ?
C6 C7 H7C 109.5 . . ?
H7A C7 H7C 109.5 . . ?
H7B C7 H7C 109.5 . . ?
C14 C16 H16A 109.5 . . ?
C14 C16 H16B 109.5 . . ?
H16A C16 H16B 109.5 . . ?
C14 C16 H16C 109.5 . . ?
H16A C16 H16C 109.5 . . ?
H16B C16 H16C 109.5 . . ?
C14 C15 H15A 109.5 . . ?
C14 C15 H15B 109.5 . . ?
H15A C15 H15B 109.5 . . ?
C14 C15 H15C 109.5 . . ?
H15A C15 H15C 109.5 . . ?
H15B C15 H15C 109.5 . . ?
C24 C25 H25A 109.5 . . ?
C24 C25 H25B 109.5 . . ?
H25A C25 H25B 109.5 . . ?
C24 C25 H25C 109.5 . . ?
H25A C25 H25C 109.5 . . ?
H25B C25 H25C 109.5 . . ?
 
loop_
    _geom_torsion_atom_site_label_1
    _geom_torsion_atom_site_label_2
    _geom_torsion_atom_site_label_3
    _geom_torsion_atom_site_label_4
    _geom_torsion
    _geom_torsion_site_symmetry_1
    _geom_torsion_site_symmetry_2
    _geom_torsion_site_symmetry_3
    _geom_torsion_site_symmetry_4
    _geom_torsion_publ_flag
C11 N10 N9 C6 -102.98(14) . . . . ?
C5 N1 N2 N3 0.98(14) . . . . ?
C18 N1 N2 N3 175.39(11) . . . . ?
N1 N2 N3 N4 -0.78(14) . . . . ?
C5 N4 N3 N2 0.29(15) . . . . ?
C14 O13 C11 O12 -8.6(2) . . . . ?
C14 O13 C11 N10 171.53(11) . . . . ?
N9 N10 C11 O12 11.4(2) . . . . ?
N9 N10 C11 O13 -168.82(11) . . . . ?
N3 N4 C5 N1 0.33(14) . . . . ?
N3 N4 C5 C6 178.53(12) . . . . ?
N2 N1 C5 N4 -0.81(14) . . . . ?
C18 N1 C5 N4 -174.48(12) . . . . ?
N2 N1 C5 C6 -179.01(12) . . . . ?
C18 N1 C5 C6 7.3(2) . . . . ?
C22 O21 C19 O20 -1.48(19) . . . . ?
C22 O21 C19 C18 -178.57(10) . . . . ?
C11 O13 C14 C15 63.68(16) . . . . ?
C11 O13 C14 C17 -60.99(16) . . . . ?
C11 O13 C14 C16 -178.77(12) . . . . ?
N10 N9 C6 C5 -84.27(12) . . . . ?
N10 N9 C6 C8 36.97(15) . . . . ?
N10 N9 C6 C7 159.19(10) . . . . ?
N4 C5 C6 N9 138.13(13) . . . . ?
N1 C5 C6 N9 -43.98(16) . . . . ?
N4 C5 C6 C8 14.40(18) . . . . ?
N1 C5 C6 C8 -167.71(12) . . . . ?
N4 C5 C6 C7 -106.26(15) . . . . ?
N1 C5 C6 C7 71.63(16) . . . . ?
C5 N1 C18 C19 75.59(16) . . . . ?
N2 N1 C18 C19 -97.42(13) . . . . ?
C5 N1 C18 C23 -162.80(12) . . . . ?
N2 N1 C18 C23 24.18(16) . . . . ?
O20 C19 C18 N1 22.73(17) . . . . ?
O21 C19 C18 N1 -160.18(10) . . . . ?
O20 C19 C18 C23 -99.97(15) . . . . ?
O21 C19 C18 C23 77.11(13) . . . . ?
N1 C18 C23 C24 64.06(15) . . . . ?
C19 C18 C23 C24 -175.24(11) . . . . ?
C18 C23 C24 C25 59.02(16) . . . . ?
C18 C23 C24 C26 -178.48(12) . . . . ?
 
# The following lines are used to test the character set of files sent by
# network email or other means. They are not part of the CIF data set
# abcdefghijklmnopqrstuvwxyzABCDEFGHIJKLMNOPQRSTUVWXYZ0123456789
# !@#$%^&*()_+{}:"~<>?|\-=[];'`,./
 
# END of CIF
